# Supplementary material for: Controlling ligand density and viscoelasticity in synthetic biomimetic polyisocyanide hydrogels for studying cell behaviours: the key to truly biomimetic hydrogels
Source: Royal Society of Chemistry journal article supplement (doi:10.1039/d4ma00793j), 2024-01-01
Supplement: d4ma00793j1.pdf [file d4ma00793j1.pdf]

## Supporting Information

### **Controlling Ligand Density and Viscoelasticity in Synthetic Biomimetic Polyisocyanide Hydrogels for Studying Cell Behaviours: The Key to Truly Biomimetic Hydrogels**

Nicholas J. Westra van Holthe\*<sup>1,3</sup>, Zhao Wang<sup>1</sup>, Jan Lauko<sup>1</sup>, Elliot P. Gilbert<sup>2</sup>, Vishaak Gangasandra<sup>1</sup>, Alan E. Rowan\*<sup>1,3</sup>

<sup>1</sup>Australian Institute for Bioengineering and Nanotechnology, The University of Queensland, Brisbane, Queensland 4072, Australia

<sup>2</sup>Australian Centre for Neutron Scattering, Australian Nuclear Science and Technology Organisation, Lucas Heights, NSW 2234, Australia.

<sup>3</sup>ARC Centre of Excellence in Quantum Biotechnology, St Lucia, Queensland, Australia.

Correspondence to:

Nicholas J. Westra Van Holthe ([n.westrvanholthe@uq.edu.au](mailto:n.westrvanholthe@uq.edu.au)) and,  
Alan E. Rowan ([alan.rowan@uq.edu.au](mailto:alan.rowan@uq.edu.au))

## List of abbreviations

|                   |                                                             |
|-------------------|-------------------------------------------------------------|
| $\sigma_c$        | Critical stress                                             |
| DMEM              | Dulbecco's Modified Eagle Medium                            |
| ECM               | Extracellular matrix                                        |
| Et <sub>3</sub> N | Triethylamine                                               |
| FTIR              | Fourier-transform infrared                                  |
| $G_0$             | Bulk stiffness                                              |
| $G'$              | Storage modulus                                             |
| $G''$             | Loss modulus                                                |
| GRGDS             | Peptide sequence Gly-Arg-Gly-Asp-Ser                        |
| $K'$              | Differential modulus                                        |
| LC-MS             | Liquid chromatography-mass spectrometry                     |
| LCST              | Lower critical solution temperature                         |
| $M_{co}$          | Molecular weight of the average repeating copolymer subunit |
| MeCN              | Acetonitrile                                                |
| $M_v$             | Viscosity average molecular weight                          |
| PFA               | Paraformaldehyde                                            |
| PIC               | Polyisocyanopeptide                                         |
| SANS              | Small-angle neutron scattering                              |
| SDD               | Sample-to-detector distance                                 |
| SPAAC             | Strain-promoted azide-alkyne cycloaddition                  |
| SSD               | Source-to-sample                                            |
| $T_{1/2}$         | Stress relaxation half-life                                 |
| $T_{gel}$         | Gelation temperature                                        |

# 1 Peptide-linker Synthesis

## 1.1 Non-aqueous methodology

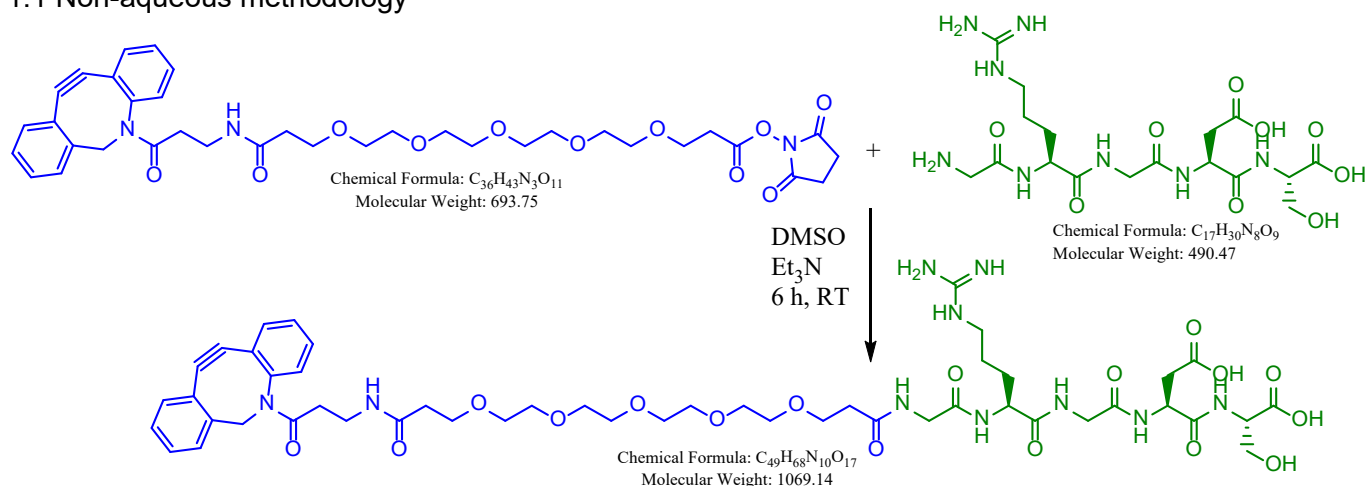

Figure S1: GRGDS-DBCO peptide-linker synthesis in non-aqueous conditions

The GRGDS-DBCO linker was synthesised by combining DBCO-PEG5-NHS (0.055 g, 0.079 mmol) with GRGDS (0.054 g, 0.111 mmol) in anhydrous DMSO (4 mL) and triethylamine (Et<sub>3</sub>N, 0.05 mL, 0.396 mmol). The reaction mixture was stirred at room temperature for 4 h protected from light. The efficacy of the peptide-linker synthesis and the ratio of product to starting material was determined by liquid chromatography - mass spectrometry (LC-MS) conducted using a Dionex HPLC module equipped with a 4.6 x 50 mm C18 Kintetex column and UV-Vis detector connected to a ThermoFisher TSQ Quantum Ultra QqQ MS. The crude mixture was separated through the C18 column with an eluent system starting at 95% A: 5% B and moving through a gradient to 100% B (A = 0.2% formic acid in H<sub>2</sub>O, B = 0.2% formic acid 80% MeCN in H<sub>2</sub>O). m/z: calculated for  $C_{49}H_{68}N_{10}O_{17}$  1068.48, found 1069.69 ([M + H]<sup>+</sup>).

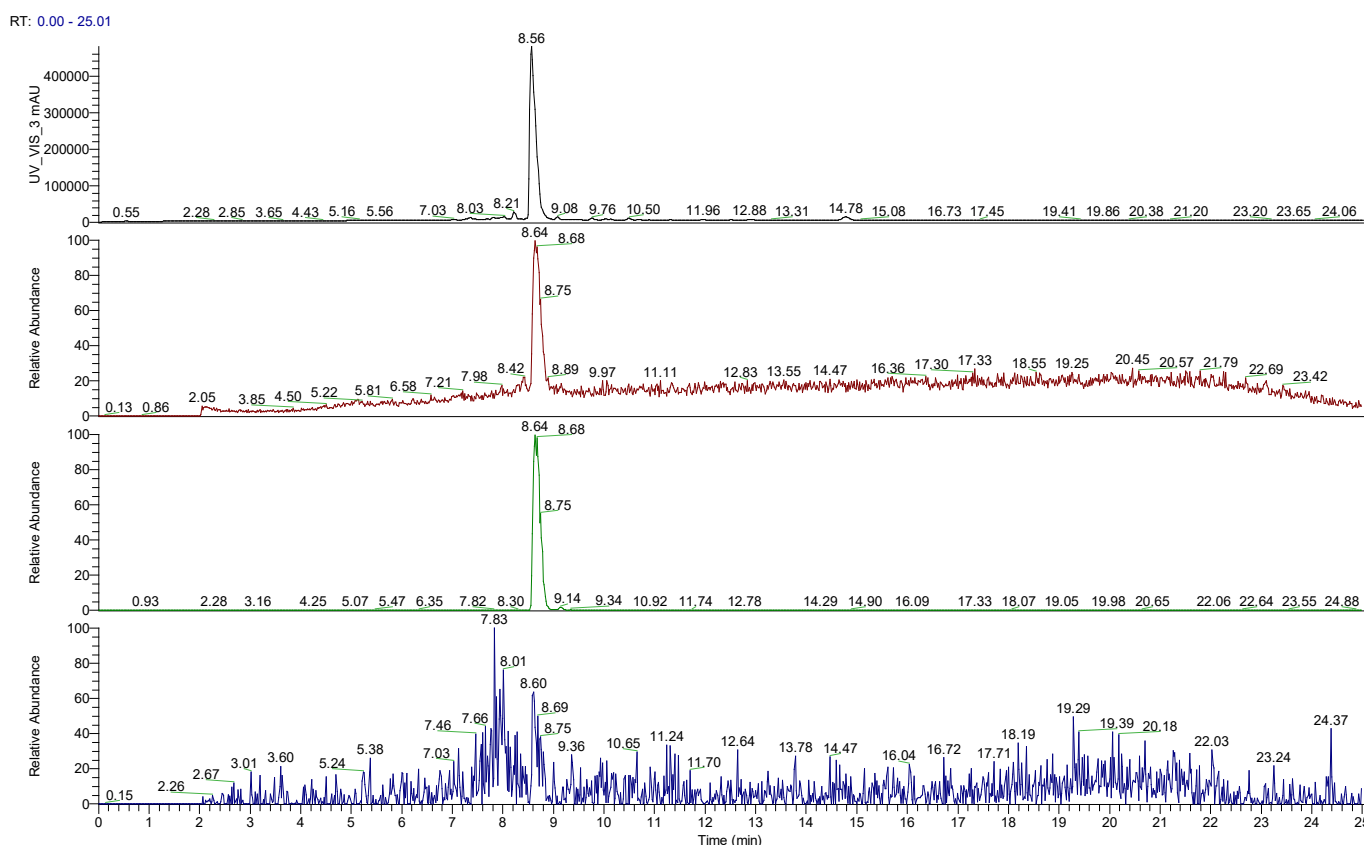

Figure S2: HPLC chromatogram of the crude GRGDS-DBCO peptide-linker reaction mixture synthesised in anhydrous DMSO. UV-Vis detector channel 310 nm, total ion count chromatogram, ion count chromatogram for product (mass range 1068-1070 m/z) and, ion count chromatogram for unreacted reagent (mass range 693-695 m/z), top to bottom respectively. Eluent system; A = 0.2% formic acid in H<sub>2</sub>O, B = 0.2% formic acid, 80% MeCN in H<sub>2</sub>O. Gradient eluent starting at 95% A 5% B to 100% B over 25 minutes.

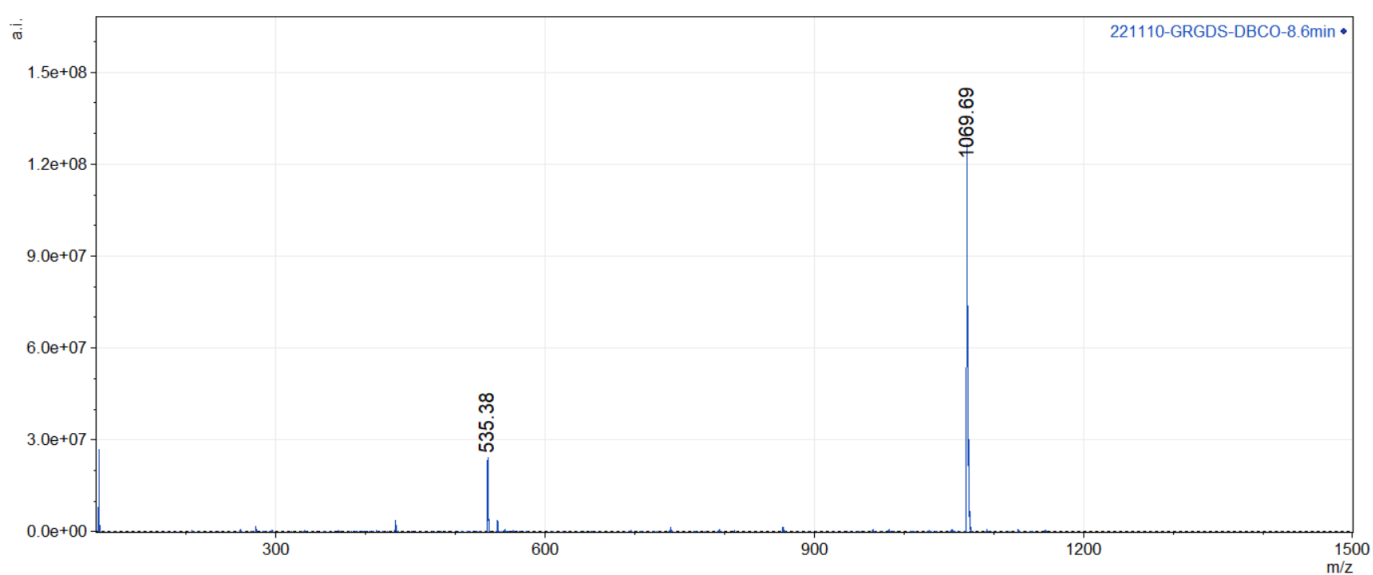

Figure S3: Mass spectra snapshot of HPLC chromatogram for crude GRGDS-DBCO reaction mixture synthesised in anhydrous DMSO at 8.64 min retention time. GRGDS-DBCO linker: m/z: calculated for C<sub>49</sub>H<sub>68</sub>N<sub>10</sub>O<sub>17</sub> 1068.48, found 1069.69 ([M + H]<sup>+</sup>).

## 1.2 Aqueous methodology

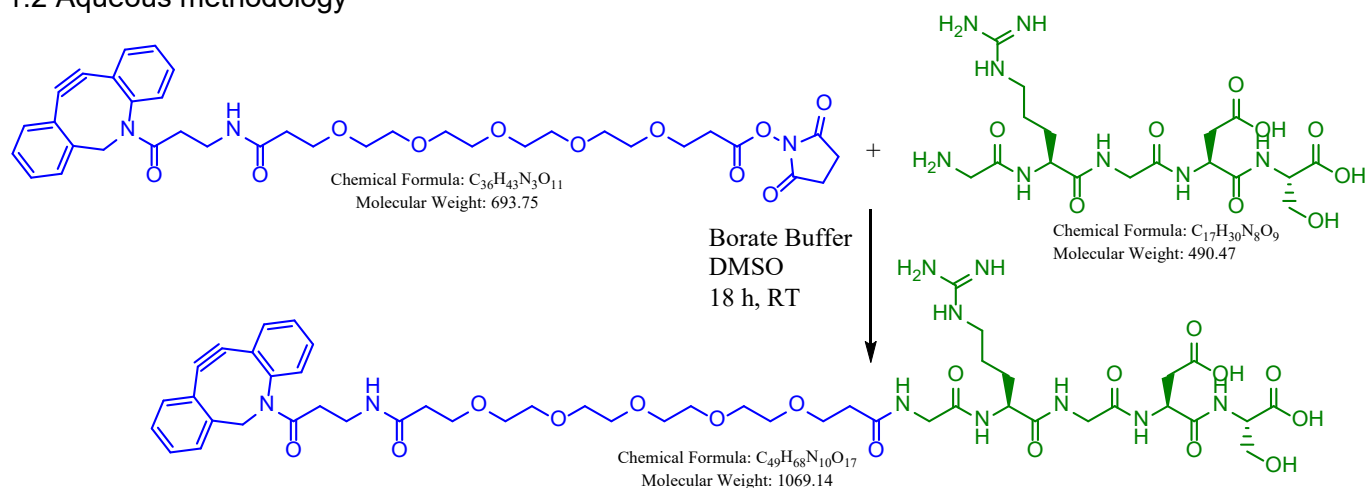

Figure S4: GRGDS-DBCO peptide-linker synthesis scheme in the commonly reported aqueous conditions

GRGDS (0.009 g, 0.019 mmol) was dissolved in borate buffer (1.50 mL, 6 mg mL<sup>-1</sup>) and combined with a solution of DBCO-PEG5-NHS (0.010 g, 0.015 mmol) dissolved in DMSO (1.66 mL, 6 mg mL<sup>-1</sup>). The reaction mixture was stirred at room temperature for 17 h protected from light. The efficacy of the peptide-linker synthesis and the ratio of product to starting material at 17 h was determined by liquid chromatography - mass spectrometry (LC-MS) with a Dionex HPLC module equipped with a 4.6 x 50 mm C18 Kinetex column and UV-Vis detector connected to a ThermoFisher TSQ Quantum Ultra QqQ MS. The crude mixture was separated through the C18 column with an eluent system starting at 95% A: 5% B and moving through a gradient to 100% B (A = 0.2% formic acid in H<sub>2</sub>O, B = 0.2% formic acid 80% MeCN in H<sub>2</sub>O). m/z: calculated for C<sub>49</sub>H<sub>68</sub>N<sub>10</sub>O<sub>17</sub> 1068.48, found 1069.52 ([M + H]<sup>+</sup>).

RT: 0.00 - 25.01

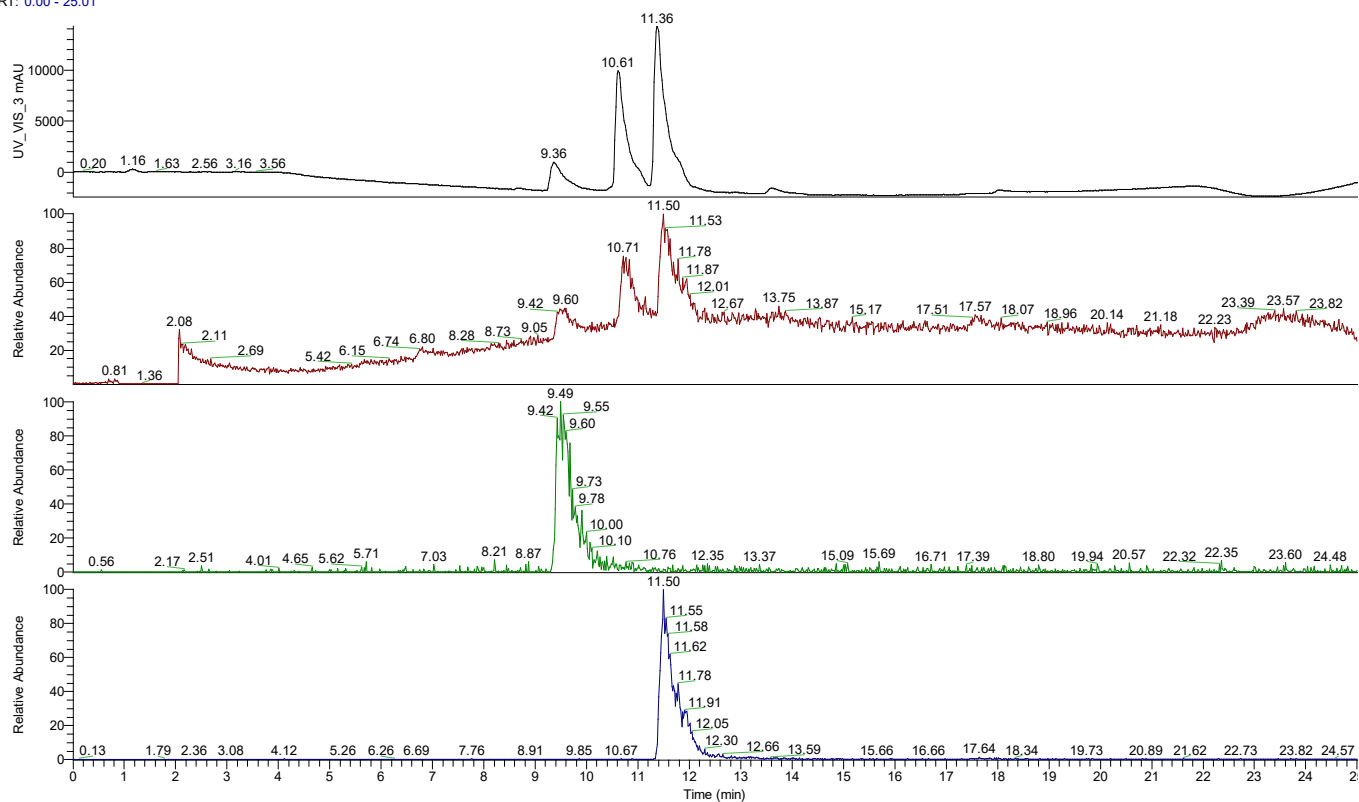

Figure S5: HPLC chromatogram of the crude GRGDS-DBCO reaction mixture synthesised via the aqueous methodology with borate buffer. UV-Vis detector channel 310 nm, total ion count chromatogram, ion count chromatogram for product (mass range 1068-1070 m/z) and, ion count chromatogram for unreacted reagent (mass range 693-695 m/z), top to bottom respectively. Eluent system; A = 0.2% formic acid in H<sub>2</sub>O, B = 0.2% formic acid 80% MeCN in H<sub>2</sub>O. Gradient eluent starting at 95% A 5% B to 100% B over 25 minutes.

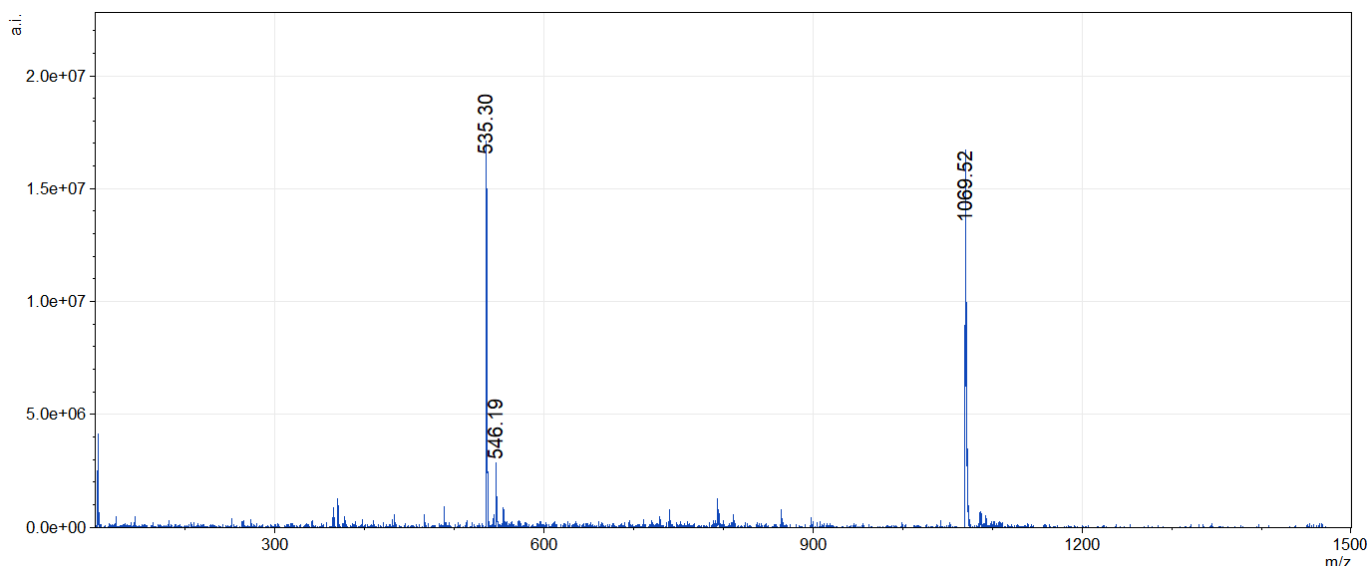

Figure S6: Mass spectra snapshot of HPLC chromatogram for crude GRGDS-DBCO reaction mixture synthesised in borate buffer at 9.5 min retention time. GRGDS-DBCO linker: m/z: calculated for C<sub>49</sub>H<sub>68</sub>N<sub>10</sub>O<sub>17</sub> 1068.48, found 1069.52 ([M + H]<sup>+</sup>).

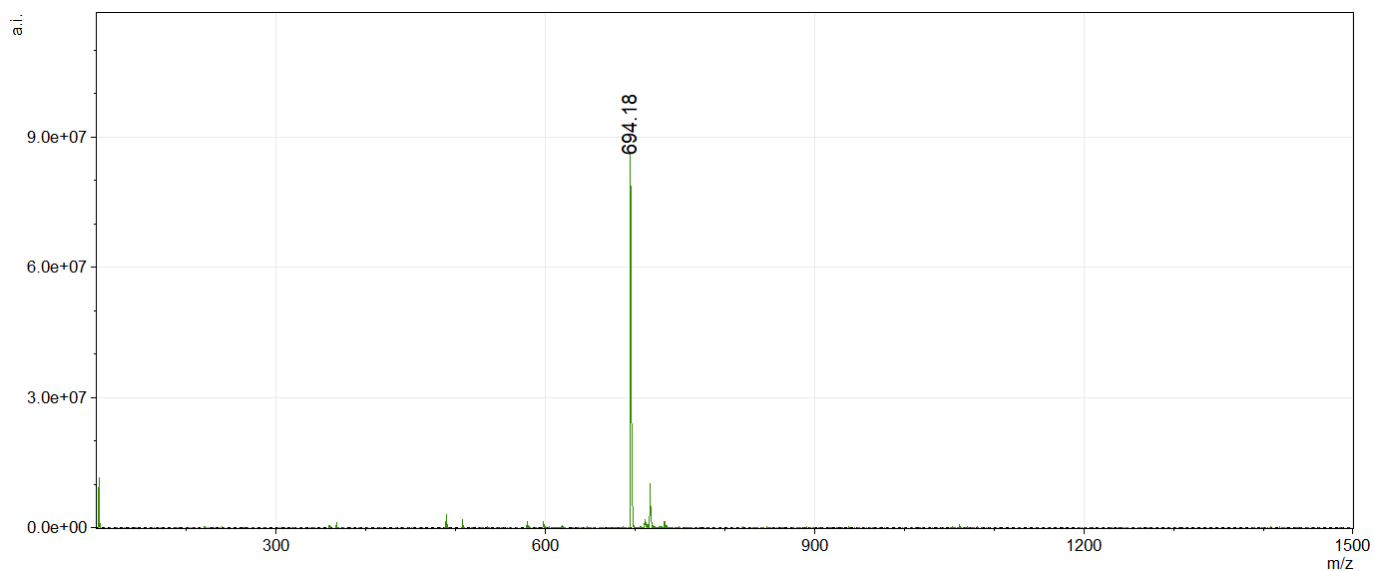

Figure S7: Mass spectra snapshot of HPLC chromatogram for crude GRGDS-DBCO reaction mixture synthesised in borate buffer at 11.5 min retention time. DBCO-PEG5-NHS: m/z: calculated for  $C_{36}H_{43}N_3O_{11}$  693.29, found 694.18 ( $[M + H]^+$ ).

## Synthesis and Characterisation of Polyisocyanides.

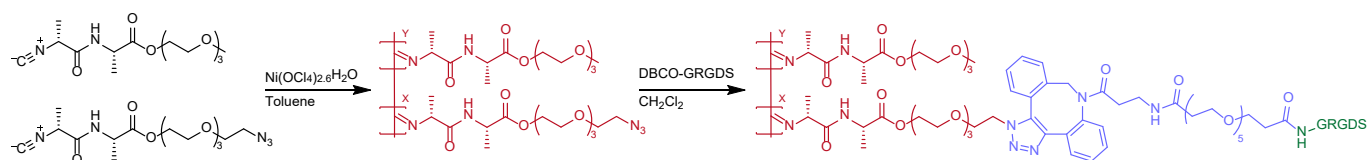

Figure S8: Synthesis scheme for peptide-decorated polyisocyanide polymers

All polymers were synthesised by loading the methoxy isocyanide monomer and azide isocyanide monomer as required, into a dried 100 mL round bottom flask with a B29 size socket. The flask was equipped with a sufficiently large magnetic stir bar and vacuum-dried prior dissolving in toluene. An inert atmosphere was generated through 3 successive vacuum/argon cycles before the isocyanide monomers were dissolved in anhydrous toluene. A stock solution of  $\text{Ni}(\text{ClO}_4)_2 \cdot 6\text{H}_2\text{O}$  was prepared in a 10 mL volumetric flask with 1 mL of anhydrous EtOH and 9 mL of anhydrous toluene. The appropriate amount of  $\text{Ni}(\text{ClO}_4)_2 \cdot 6\text{H}_2\text{O}$  catalyst was combined with the monomer solution to initiate the polymerisation using a 500  $\mu\text{L}$  gas-tight syringe. The polymerisation mixture was stirred under an argon atmosphere for approximately 48 h. IR analysis confirmed the completion of the polymerisation through consumption of the isocyanide peak ( $2142 \text{ cm}^{-1}$ ). Once the polymerization was confirmed complete, the solvent was removed *in vacuo*. The crude polymer was redissolved in  $\text{CH}_2\text{Cl}_2$  and precipitated three times against cold diisopropyl ether collected over a sintered funnel. Purified polymer was dried on a rotary evaporator then stored under reduced pressure overnight, yielding a beige fibrous solid.

**PIC-0:** 2-(2-(2-methoxyethoxy)ethoxy)ethyl ((R)-2 isocyanopropanoyl)-L-alaninate (1.16 g,  $3.68 \times 10^{-3}$  mol) was dissolved in anhydrous toluene (30 mL) before adding the  $\text{Ni}(\text{ClO}_4)_2 \cdot 6\text{H}_2\text{O}$  catalyst solution ( $2.09 \times 10^{-6}$  mol). Yield 1.00 g (86.2%).

**PIC-0.5:** Isocyanide monomers 2-(2-(2-methoxyethoxy)ethoxy)ethyl ((R)-2 isocyanopropanoyl)-L-alaninate (1.18 g,  $3.73 \times 10^{-3}$  mol) and 2-(2-(2-(2-azidoethoxy)ethoxy)ethoxy)ethyl ((R)-2-isocyanopropanoyl)-L-alaninate (0.007 g,  $1.86 \times 10^{-5}$  mol) were combined with anhydrous toluene (30 mL) and  $\text{Ni}(\text{ClO}_4)_2 \cdot 6\text{H}_2\text{O}$  catalyst solution ( $2.78 \times 10^{-6}$  mol). Yield 1.00 g (84.4%).

**PIC-1.0:** Isocyanide monomers 2-(2-(2-methoxyethoxy)ethoxy)ethyl ((R)-2 isocyanopropanoyl)-L-alaninate (1.12 g,  $3.55 \times 10^{-3}$  mol) and 2-(2-(2-(2-azidoethoxy)ethoxy)ethoxy)ethyl ((R)-2-isocyanopropanoyl)-L-alaninate (0.015 g,  $4.03 \times 10^{-5}$  mol) were combined with anhydrous toluene (30 mL) and  $\text{Ni}(\text{ClO}_4)_2 \cdot 6\text{H}_2\text{O}$  catalyst solution ( $1.80 \times 10^{-6}$  mol). Yield 0.866 g (76.4%).

**PIC-3.0:** Isocyanide monomers 2-(2-(2-methoxyethoxy)ethoxy)ethyl ((R)-2 isocyanopropanoyl)-L-alaninate (1.11 g,  $3.50 \times 10^{-3}$  mol) and 2-(2-(2-(2-azidoethoxy)ethoxy)ethoxy)ethyl ((R)-2-isocyanopropanoyl)-L-alaninate (0.04 g,  $1.08 \times 10^{-4}$  mol) were combined with anhydrous toluene (30 mL) and  $\text{Ni}(\text{ClO}_4)_2 \cdot 6\text{H}_2\text{O}$  catalyst solution ( $1.81 \times 10^{-6}$  mol). Yield 0.974 g (84.6%).

**PIC-6.0:** Isocyanide monomers 2-(2-(2-methoxyethoxy)ethoxy)ethyl ((R)-2 isocyanopropanoyl)-L-alaninate (1.13 g,  $3.56 \times 10^{-3}$  mol) and 2-(2-(2-(2-azidoethoxy)ethoxy)ethoxy)ethyl ((R)-2-isocyanopropanoyl)-L-alaninate (0.084 g,  $2.26 \times 10^{-4}$  mol) were combined with anhydrous toluene (30 mL) and  $\text{Ni}(\text{ClO}_4)_2 \cdot 6\text{H}_2\text{O}$  catalyst solution ( $1.89 \times 10^{-6}$  mol). Yield 0.933 g (77.0%).



## Molecular Weight Characterisation of Polyisocyanides

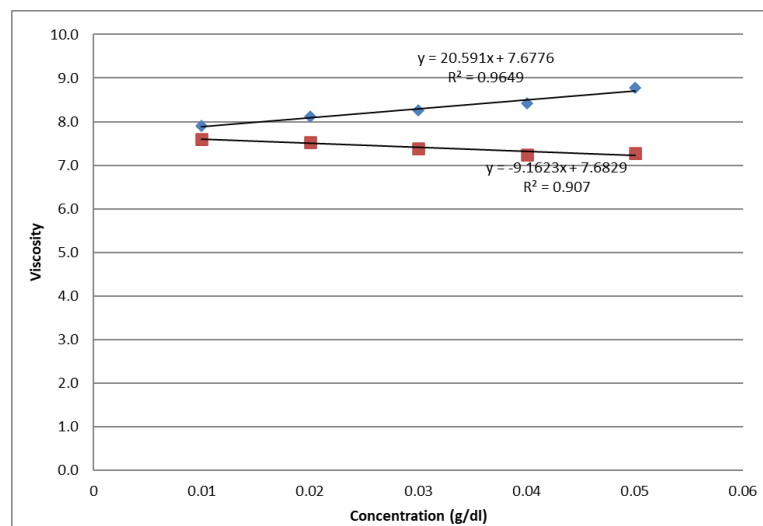

Figure S9: PIC-0 intrinsic viscosity determined from the reduced viscosity (blue) and the inherent viscosity (red) as a function of polymer concentration in acetonitrile.

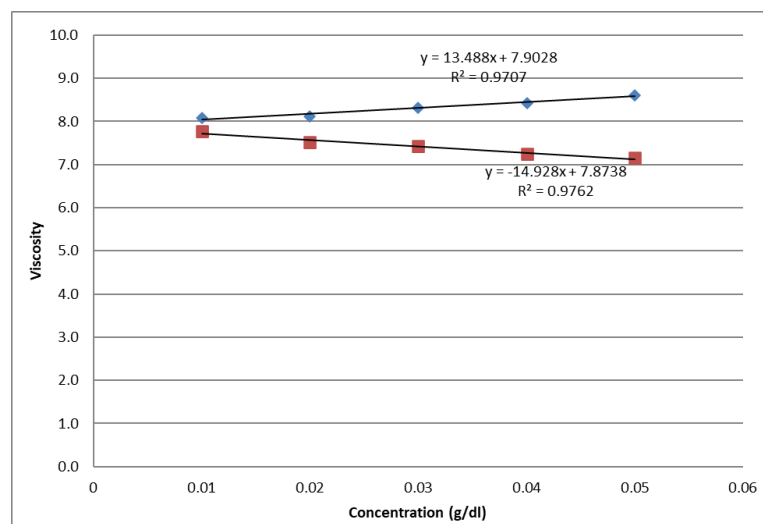

Figure S10: PIC-0.5 intrinsic viscosity determined from the reduced viscosity (blue) and the inherent viscosity (red) as a function of polymer concentration in acetonitrile.

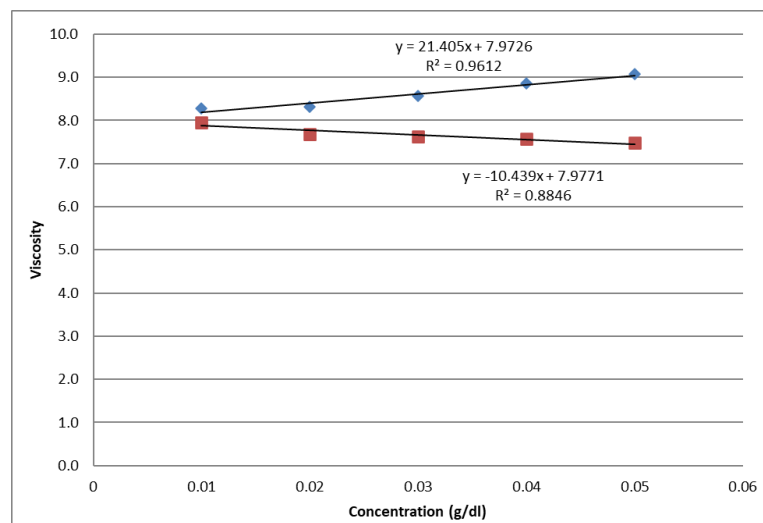

Figure S11: PIC-1.0 intrinsic viscosity determined from the reduced viscosity (blue) and the inherent viscosity (red) as a function of polymer concentration in acetonitrile.

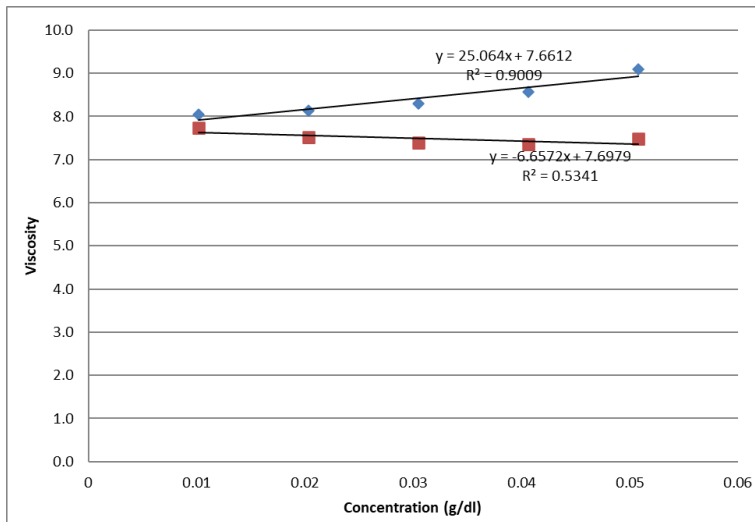

Figure S12: PIC-3.0 intrinsic viscosity determined from the reduced viscosity (blue) and the inherent viscosity (red) as a function of polymer concentration in acetonitrile.

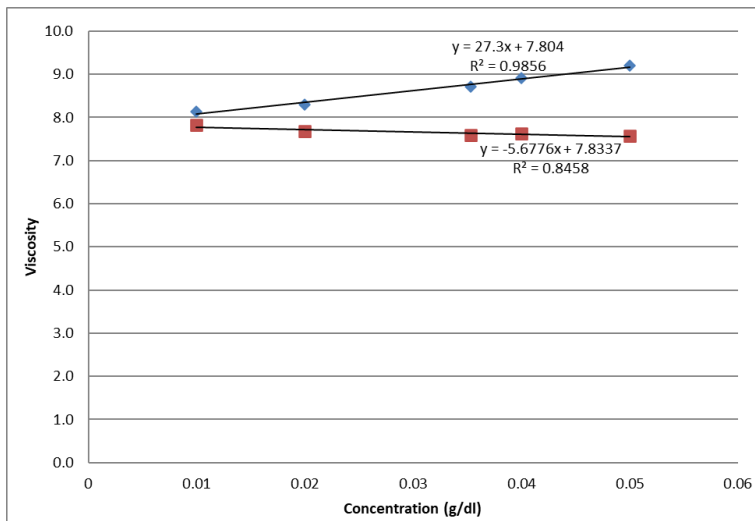

Figure S13: PIC-6.0 intrinsic viscosity determined from the reduced viscosity (blue) and the inherent viscosity (red) as a function of polymer concentration in acetonitrile.

### Calculating the polymer lengths from Mv

Polymer length (L) was calculated using the linear relationship between Mv and polymer length as previously defined by Jaspers *et. al.* (*Nat. Commun.* 2014 5:5808 doi: 10.1038/ncomms6808).

$$Y = 0.3962x + -0.1943$$

PIC-0            L = (0.3962\*368) + -0.1943            L = 145.60

PIC-0.5        L = (0.3962\*373) + -0.1943            L = 147.58

PIC-1.0        L = (0.3962\*375) + -0.1943            L = 148.38

PIC-3.0        L = (0.3962\*368) + -0.1943            L = 145.60

PIC-6.0        L = (0.3962\*371) + -0.1943            L = 146.79

## Mechanical Characterisation of Polyisocyanides

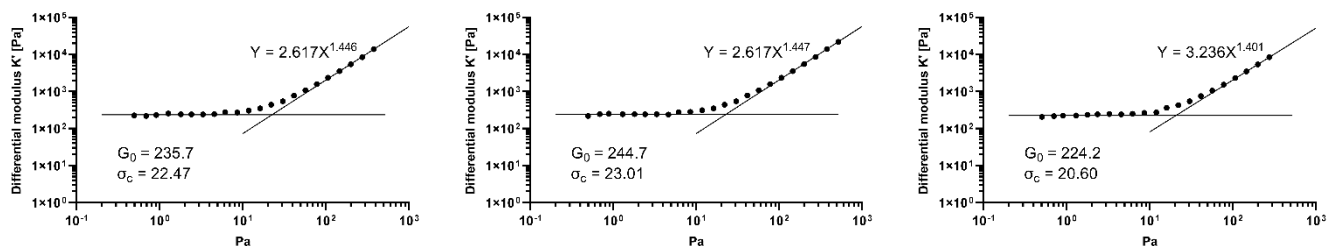

Figure S14: PIC-0 rheology analysis in water at  $6.32 \pm 0.225$  mM (2 mg/mL).

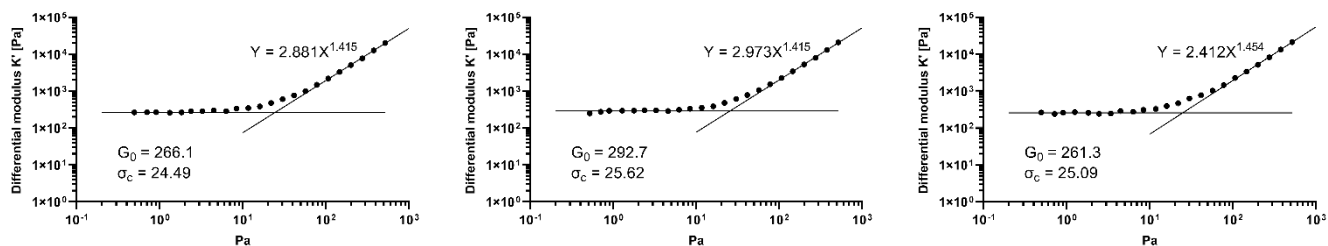

Figure S15: PIC-0.5 rheology analysis in water at  $6.32 \pm 0.225$  mM.

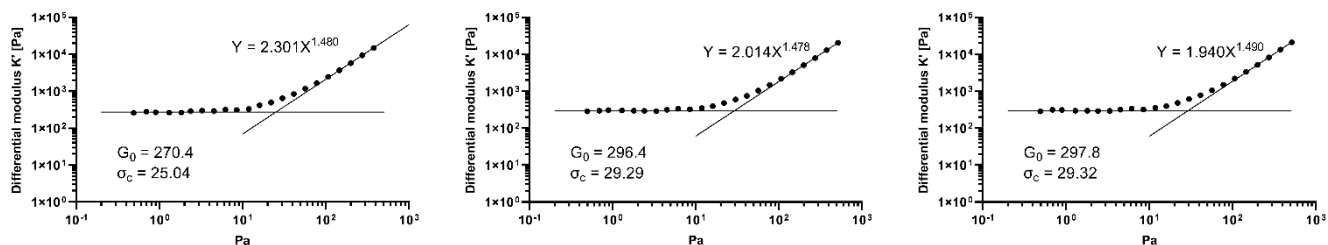

Figure S16: PIC-1.0 rheology analysis in water at  $6.32 \pm 0.225$  mM.

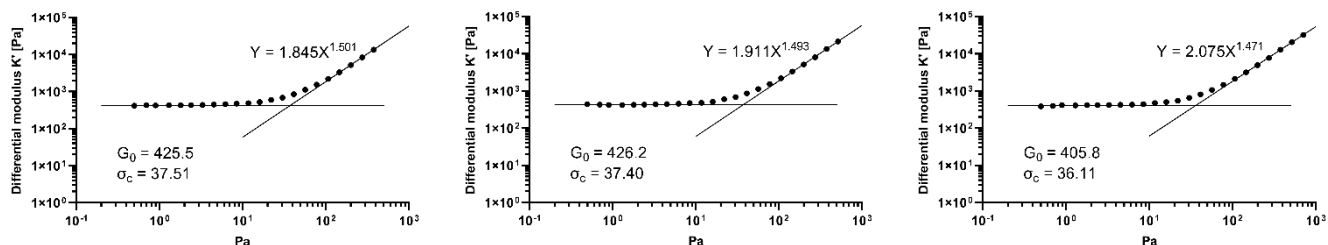

Figure S17: PIC-3.0 rheology analysis in water at  $6.32 \pm 0.225$  mM.

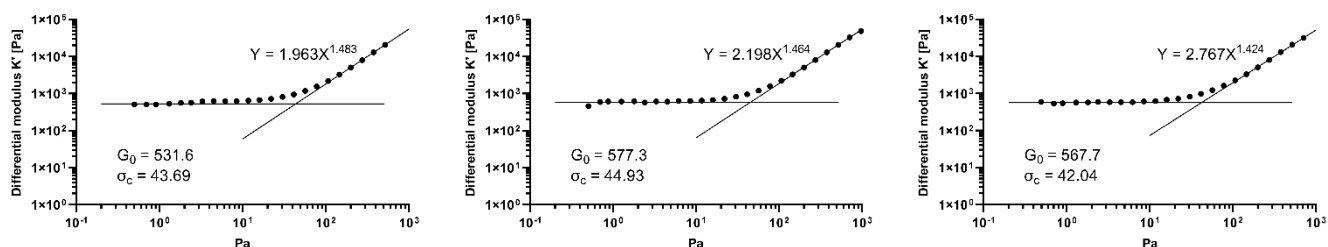

Figure S18: PIC-6.0 rheology analysis in water at  $6.32 \pm 0.225$  mM.

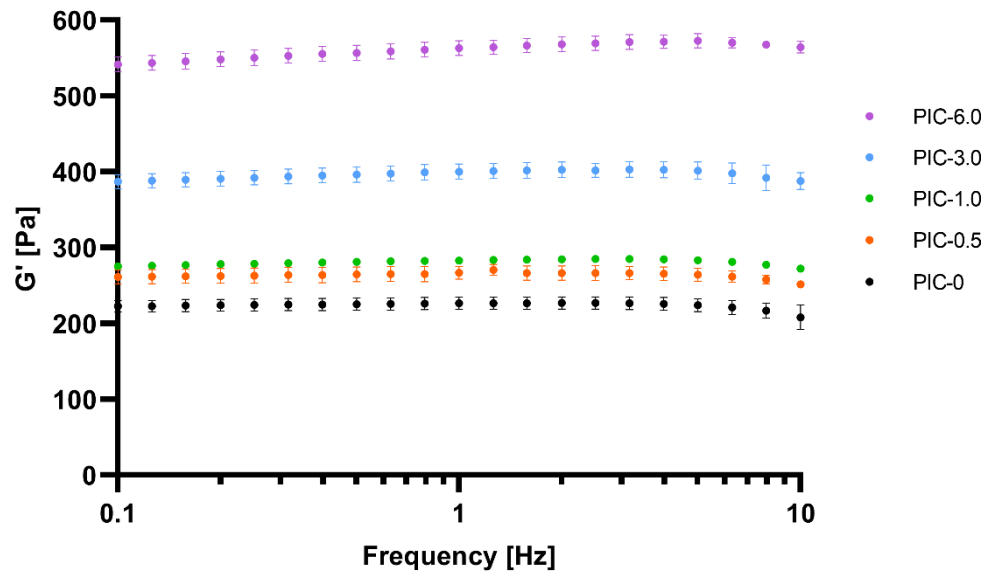

Figure S19: Frequency sweep between 0.1 and 10 Hz for PIC-0 and PIC(methoxy-co-azide) polymers with increasing azide percentage.

## Post-polymerisation Peptide Addition.

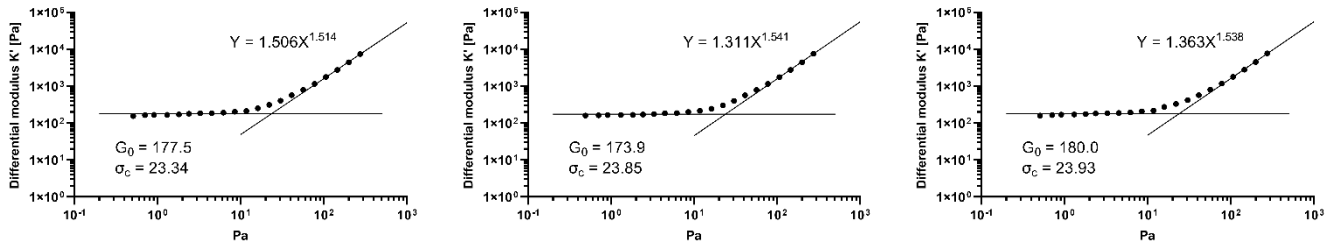

Figure S20: PIC-0.5 GRGDS rheology analysis in water at  $6.32 \pm 0.225$  mM.

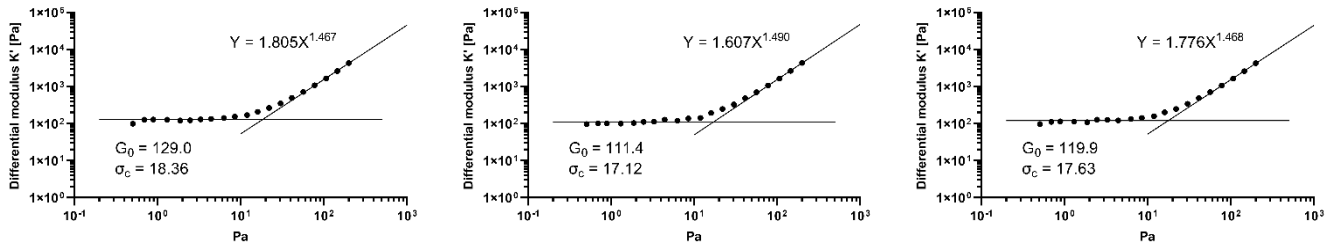

Figure S21: PIC-1.0 GRGDS rheology analysis in water at  $6.32 \pm 0.225$  mM.

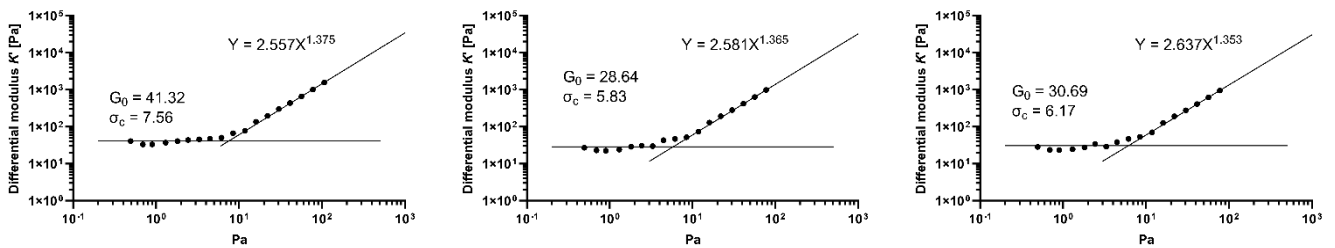

Figure S22: PIC-3.0 GRGDS rheology analysis in water at  $6.32 \pm 0.225$  mM.

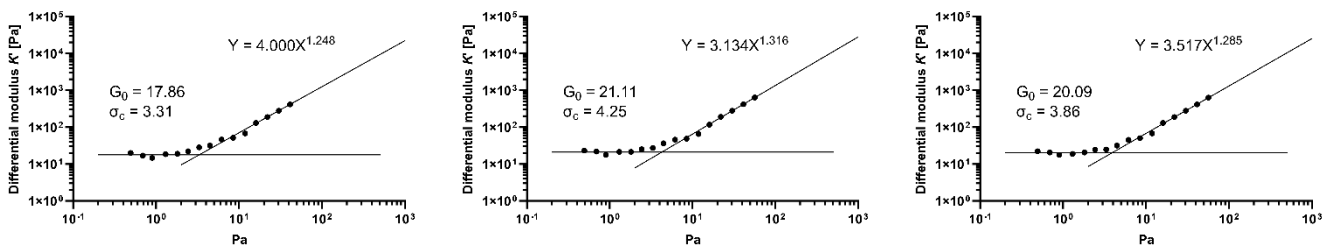

Figure S23: PIC-6.0 GRGDS rheology analysis in water at  $6.32 \pm 0.225$  mM.

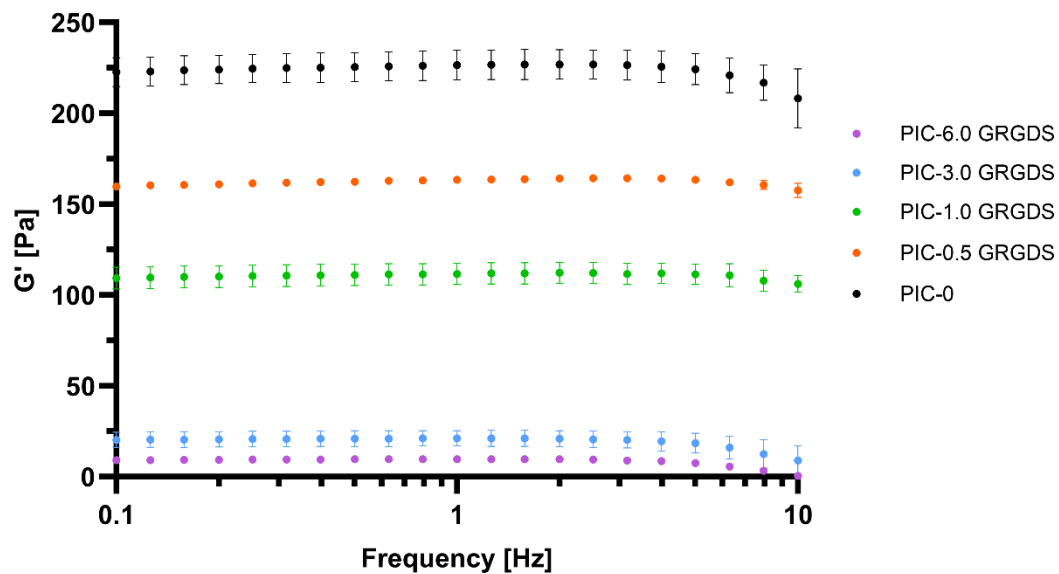

Figure S24: Frequency sweep between 0.1 and 10 Hz of peptide functionalised PIC with increasing ligand density.

Table S1: Stress relaxation half-life data for PIC-based hydrogels PIC-0 and polymer-peptide conjugates (PIC GRGDS 0.5 – 6%).

| GRGDS Ligand Density | Stress relaxation half-life ( $T_{1/2}$ ) at 5% constant strain (s) | Stress relaxation half-life ( $T_{1/2}$ ) at 20% constant strain (s) |
|----------------------|---------------------------------------------------------------------|----------------------------------------------------------------------|
| 0                    | 8690                                                                | 1151                                                                 |
| 0.5                  | 3860                                                                | 617                                                                  |
| 1                    | 3424                                                                | 486                                                                  |
| 3                    | 649.5                                                               | 433                                                                  |
| 6                    | 621.5                                                               | 349                                                                  |

## Small Angle Neutron Scattering (SANS) Plot

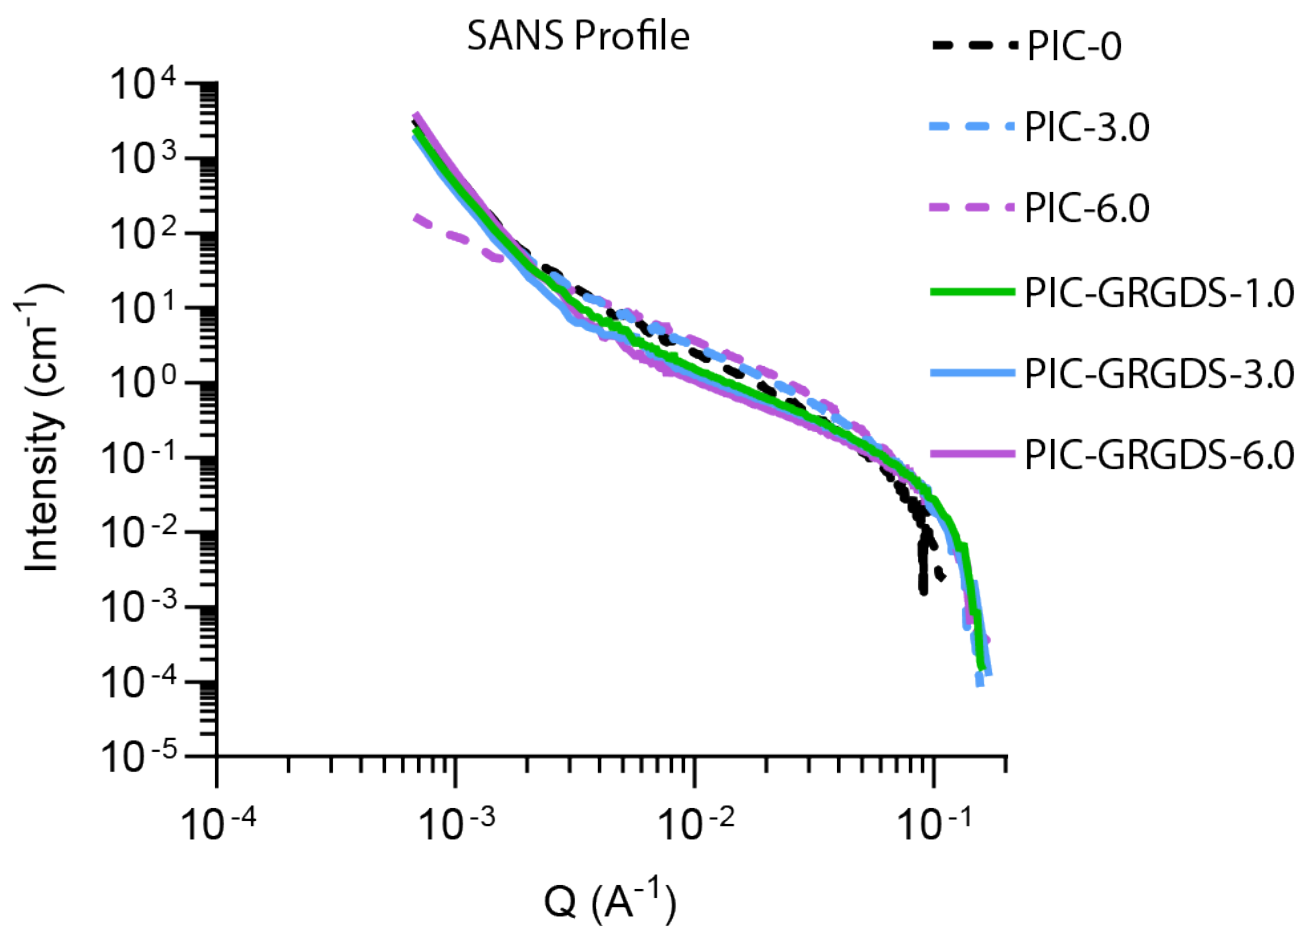

Figure S25: SANS/USANS scattering plot of PIC hydrogels  $2 \text{ mg mL}^{-1} \text{ D}_2\text{O}$ .

### 3D cultured fibroblasts at 12 hours

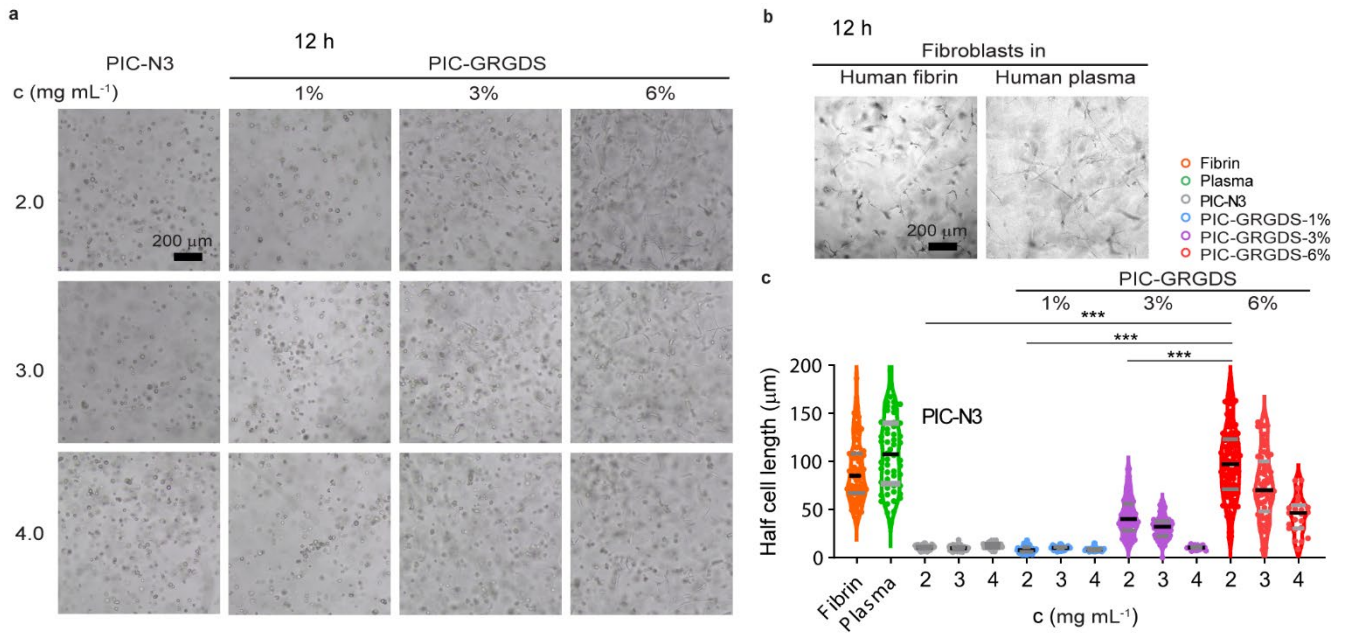

Figure S26: Early morphological change of fibroblasts in different matrices. Phage-contrast microscopic images of fibroblasts cultured in 3D PIC-based matrices (a) or in natural human fibrin network or plasma (b) at 12 hours. Scale bar, 200 μm. Quantified cell morphological changes analysed by half of the cell length (c). One-way ANOVA statistical analysis was performed. \*\*\* =  $p < 0.001$ .
